# Supplementary material for: Microbial biobanking – cyanobacteria-rich topsoil facilitates mine rehabilitation
Source: Copernicus journal article supplement (doi:10.5194/bg-16-2189-2019), 2019-05-28
Supplement: Supplementary file 1 [file bg-16-2189-2019-supplement.pdf]

Supplement of Biogeosciences, 16, 2189–2204, 2019  
<https://doi.org/10.5194/bg-16-2189-2019-supplement>  
© Author(s) 2019. This work is distributed under  
the Creative Commons Attribution 4.0 License.

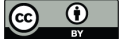

*Supplement of*

## **Microbial biobanking – cyanobacteria-rich topsoil facilitates mine rehabilitation**

**Wendy Williams et al.**

*Correspondence to:* Wendy Williams ([wendy.williams@uq.edu.au](mailto:wendy.williams@uq.edu.au))

The copyright of individual parts of the supplement might differ from the CC BY 4.0 License.

## Supplementary Tables

Table S1: Descriptions of sources for intact biocrusts used to characterise the cyanobacterial communities: Site vegetation associations: SMU 1 – Red Mallee: *Eucalyptus oleosa* ssp. *oleosa* = open Mallee/Myall woodland; SMU 2 – Chenopod Shrubland: *Maireana sedifolia* and *Atriplex vesicaria*; SMU 3 – Western Myall: *Acacia papyrocarpa Maireana sedifolia* = open Myall woodland Site 1 occurs in a transition between SMU 2 and SMU 3 but was treated as most like SMU 2; Site 6 originated from SMU 3 – \*2YO stockpile crust type determined *in situ* also with mosses present; TSF = Tailings storage facility.

| Site no. | Primary Vegetation | SMU | Biocrust types | Site identifier and description |
|----------|--------------------|-----|----------------|---------------------------------|
| 1        | Western Myall      | 2   | Types 2-5      | Edge year 3 clearance           |
| 2        | Western Myall      | 3   | Types 2-5      | Dust mon track                  |
| 3        | Western Myall      | 3   | Types 2-5      | Drill track                     |
| 4        | Red Mallee         | 1   | Types 1-3      | Drill track - dune              |
| 5        | Red Mallee         | 2   | Types 2-5      | Drill track - gilgai            |
| 6        | Western Myall      | NA  | Type 1*        | Topsoil stockpile               |
| 7        | Western Myall      | 3   | Types 2-5      | West side TSF                   |
| 8        | Chenopod           | 2   | Types 2-5      | Power Station site              |
| 9        | Red Mallee         | 1   | Types 1-2      | Canberra - dune                 |
| 10       | Red Mallee         | 1   | Types 1-3      | Nth of pit - slight dune        |

Table S2: Descriptions of biocrust morphotypes (see Büdel et al., 2009; Doudle et al., 2011)

| No. | Crust Type                                                                                         | Identification                                                                            |
|-----|----------------------------------------------------------------------------------------------------|-------------------------------------------------------------------------------------------|
| 1   | Light (pale coloured) thin cyanobacterial crust in early stages of development: early-successional | Patchy, brittle, bare patches visible, slight discolouration                              |
| 2   | Cyanobacterial crust, well established, intermediate stages of development                         | Larger pieces can be easily removed intact, dark discolouration                           |
| 3   | Biocrust, well established, with cyanolichens: late-successional                                   | Larger pieces can be easily removed intact, cyanolichens easily seen with hand lens (10x) |
| 4   | Biocrust, well established, with cyanolichens and/or green algal lichens: late-successional        | Larger pieces can be easily removed intact, liche easily seen with hand lens (10x)        |
| 5   | Biocrust (see Type 4) with mosses: late-successional                                               | Larger pieces can be easily removed intact, moss easily seen with hand lens (10x)         |

Table S3: Topsoil stockpile ages, locations and sampling depths

| Stockpile number | Date of topsoil stockpiling | Stockpile Replicate | Latitude | Longitude | Adjacent replicate | Latitude | Longitude | Soil sample depths (cm)                            | Date sampled |
|------------------|-----------------------------|---------------------|----------|-----------|--------------------|----------|-----------|----------------------------------------------------|--------------|
| 10               | 31/10/2009                  | 1                   | 0234527  | 6578956   | 1                  | 0234433  | 6578944   | 0-2, 2-4, 4-6, 10, 25, 50, 50 (sterilised control) | 8/3/12       |
| 10               | 31/10/2009                  | 2                   | 0234542  | 6578921   | 2                  | 0234422  | 6578933   | 0-2, 2-4, 4-6, 10, 25, 50, 50 (sterilised control) | 8/3/12       |
| 10               | 31/10/2009                  | 3                   | 0234557  | 6578881   | 3                  | 0234436  | 6578913   | 0-2, 2-4, 4-6, 10, 25, 50, 50 (sterilised control) | 8/3/12       |
| 12               | 6/11/2009                   | 1                   | 0233396  | 2578200   | 1                  | 0233414  | 6578180   | 0-2, 2-4, 4-6, 10, 25, 50, 50 (sterilised control) | 8/3/12       |
| 12               | 6/11/2009                   | 2                   | 0233377  | 6578206   | 2                  | 0233437  | 6578227   | 0-2, 2-4, 4-6, 10, 25, 50, 50 (sterilised control) | 8/3/12       |
| 12               | 6/11/2009                   | 3                   | 0233362  | 6578218   | 3                  | 0233431  | 6578263   | 0-2, 2-4, 4-6, 10, 25, 50, 50 (sterilised control) | 8/3/12       |
| 18               | 13/07/2010                  | 1                   | 0234870  | 6578033   | 1                  | 0234878  | 6577787   | 0-2, 2-4, 4-6, 10, 25, 50, 50 (sterilised control) | 9/3/12       |
| 18               | 13/07/2010                  | 2                   | 0234852  | 6578023   | 2                  | 0234873  | 6577776   | 0-2, 2-4, 4-6, 10, 25, 50, 50 (sterilised control) | 9/3/12       |
| 18               | 13/07/2010                  | 3                   | 0234860  | 6578007   | 3                  | 0234853  | 6577782   | 0-2, 2-4, 4-6, 10, 25, 50, 50 (sterilised control) | 9/3/12       |
| 19               | 29/06/2010                  | 1                   | 0234999  | 6578800   | 1                  | 0234922  | 6578851   | 0-2, 2-4, 4-6, 10, 25, 50, 50 (sterilised control) | 9/3/12       |
| 19               | 29/06/2010                  | 2                   | 0235000  | 6578820   | 2                  | 0234918  | 6578856   | 0-2, 2-4, 4-6, 10, 25, 50, 50 (sterilised control) | 9/3/12       |
| 19               | 29/06/2010                  | 3                   | 0235003  | 6578834   | 3                  | 0234913  | 6578849   | 0-2, 2-4, 4-6, 10, 25, 50, 50 (sterilised control) | 9/3/12       |
| 20               | 2011                        | 1                   | 023457   | 6577150   | 1                  | 0234938  | 6577286   | 0-2, 2-4, 4-6, 10, 25, 50, 50 (sterilised control) | 8/3/12       |

Supplementary Figures

Location: 016098 TARCOOLA AERO

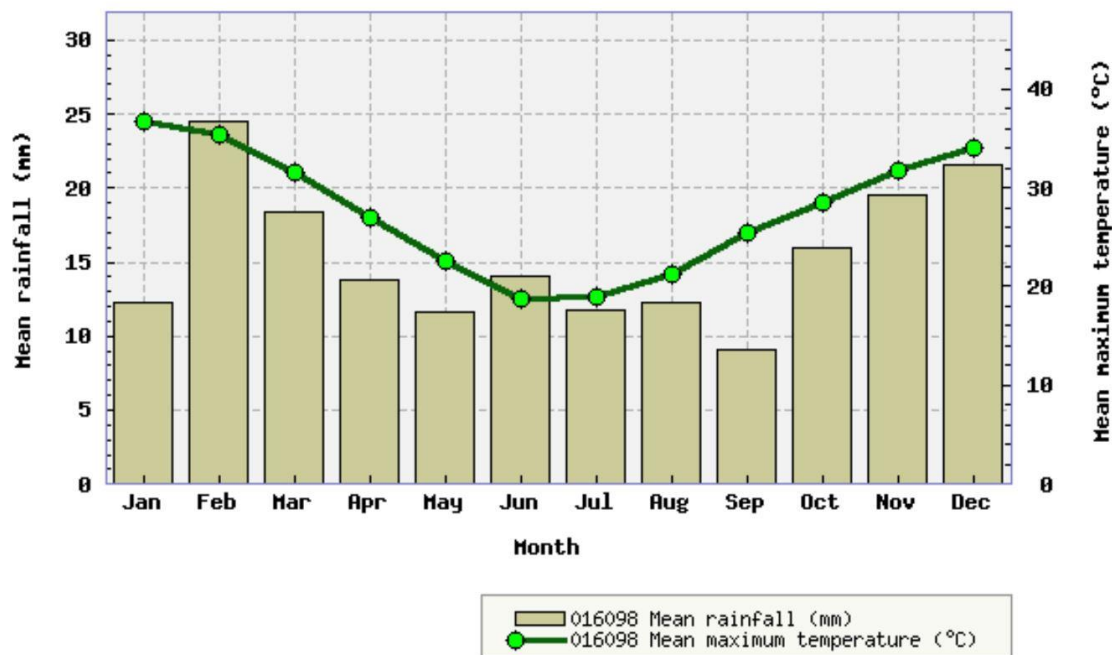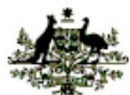

Australian Government  
Bureau of Meteorology

Figure S1: Mean monthly maximum temperature and rainfall data from nearby Tarcoola aerodrome for the past 20 years (source: bom.gov.au)

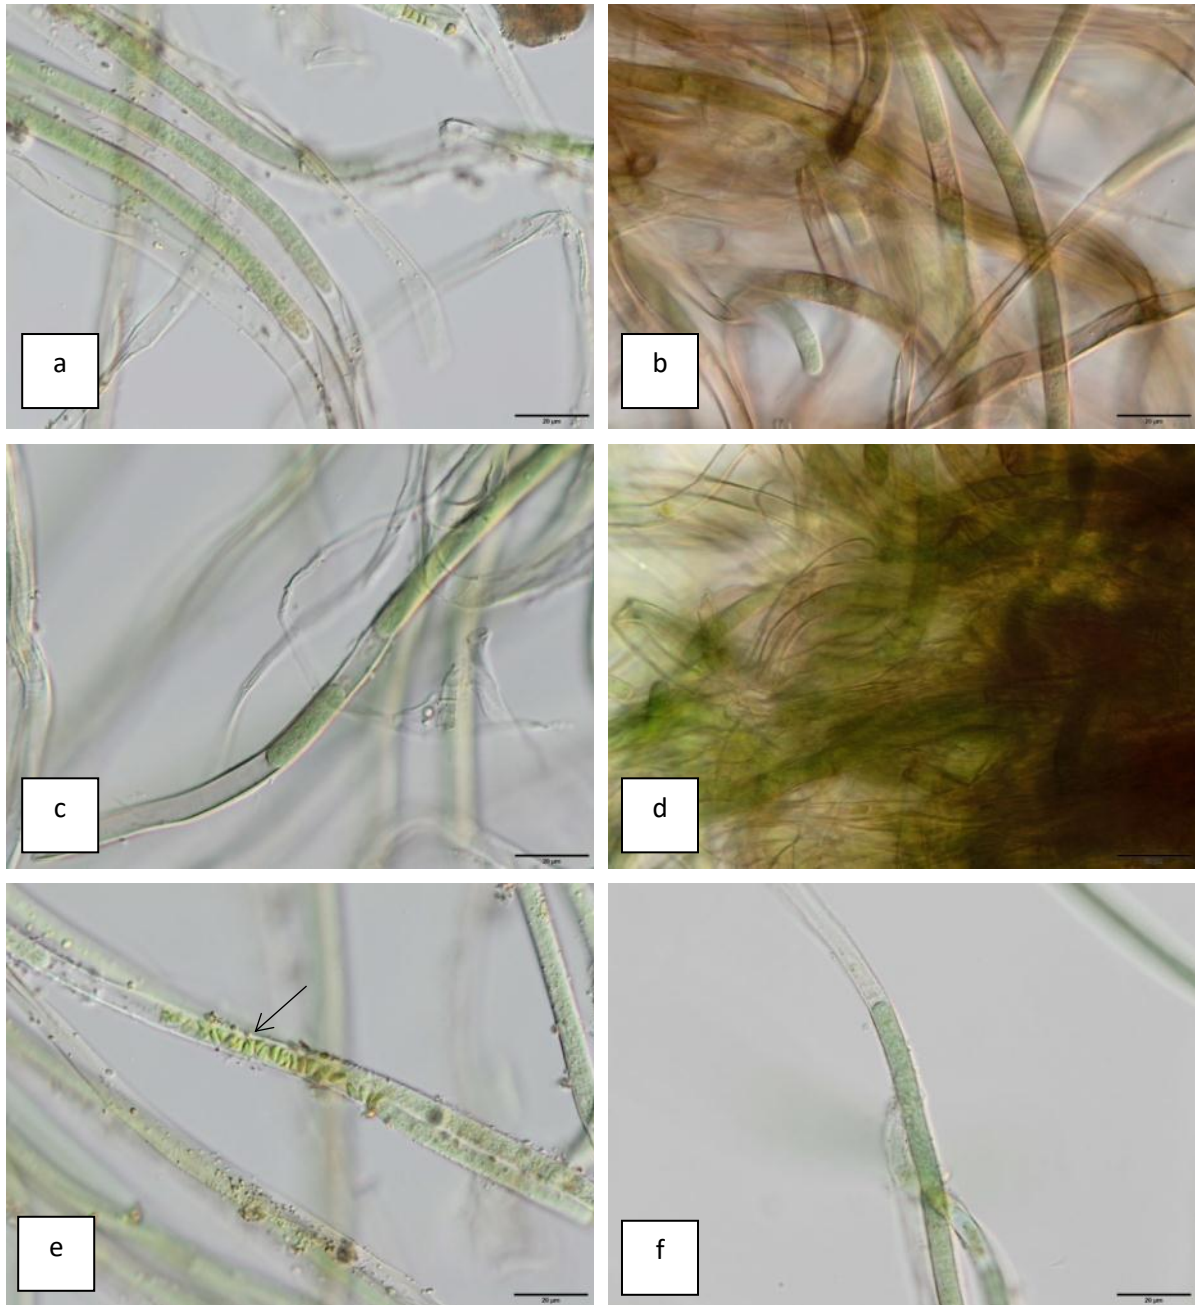

**Figure S2:** (a-f) The predominant *Symploca* species found across all sites; (b) illustrates distinctive colour found in those with UV pigmentation; (c) thin outer sheath; (d) masses of filaments that form mats; (e) desiccated cells inside sheath following period of time without moisture (arrow) and other cells already rehydrated; (f) filament with typical elongated sock-like sheath; (Scale bars 20  $\mu\text{m}$ ).

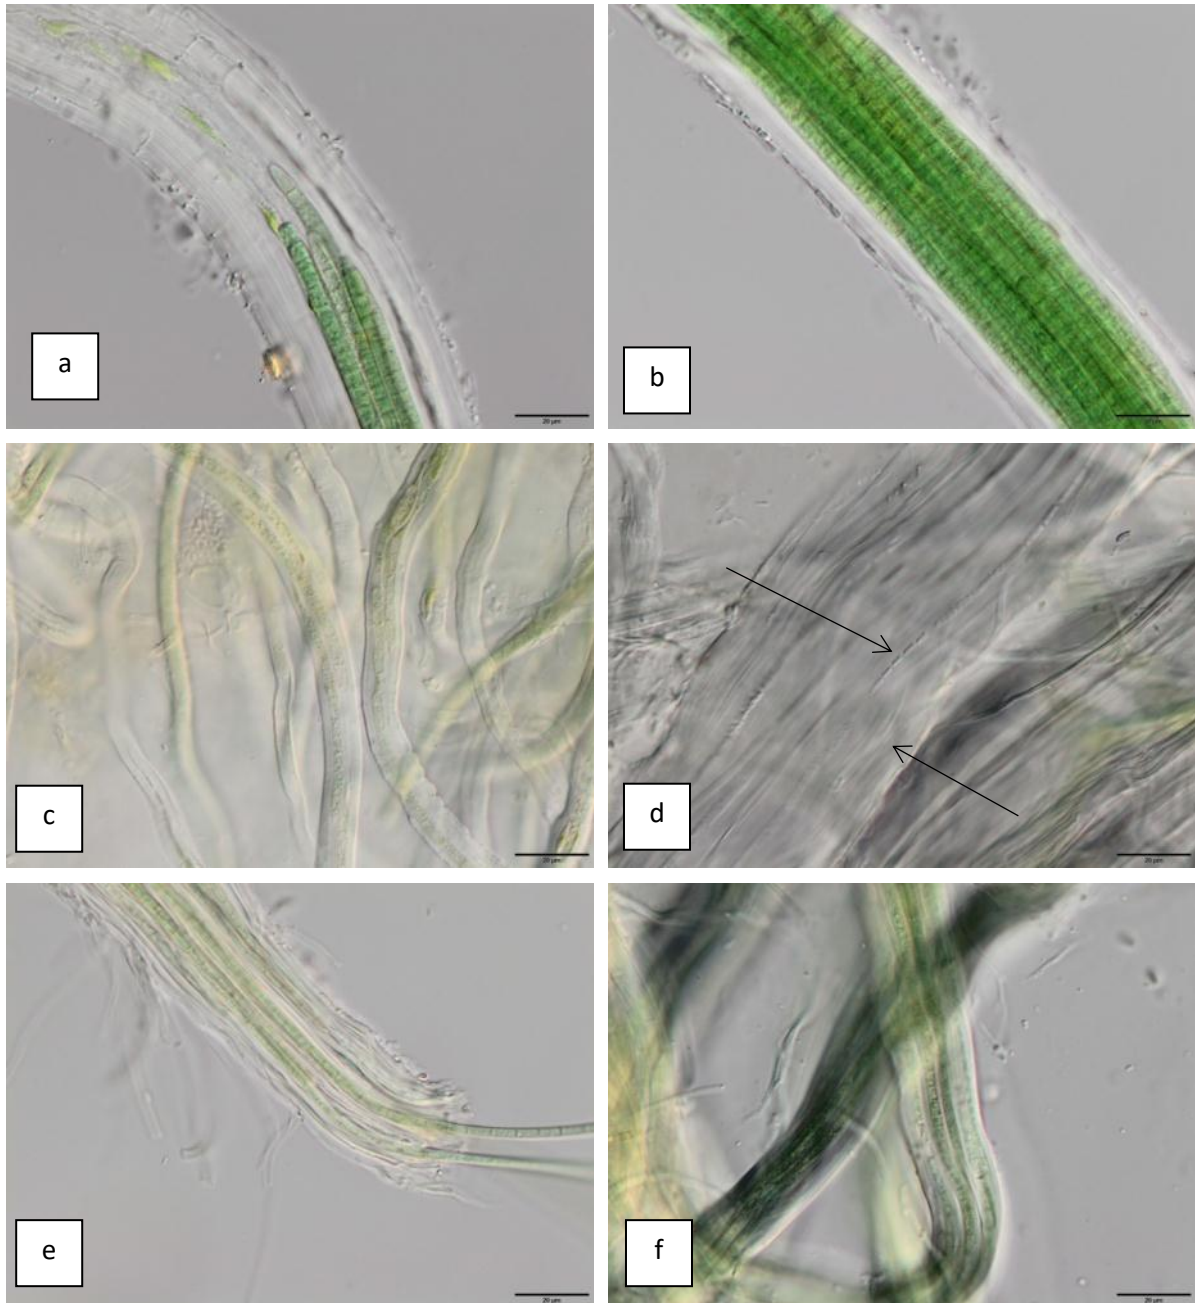

**Figure S3:** (a-b) *Microcoleus paludosus* with multiple bright trichomes encased in a common clear gelatinous sheath; (c-f) *Schizothrix*; three species were observed with varying morphological structure that included long entangled filaments with enclosed ends; *Schizothrix* was a subsurface species but was often found on the surface during a growth phase; (d) *Schizothrix* had thick, sticky, gelatinous sheaths (arrow), often with fine, almost invisible trichomes (arrow), and was hard to separate from the soil particles; (e-f) typically one or two trichomes encased in gelatinous sheaths clumped together to form rope-like filaments; (scale bars 20 µm).

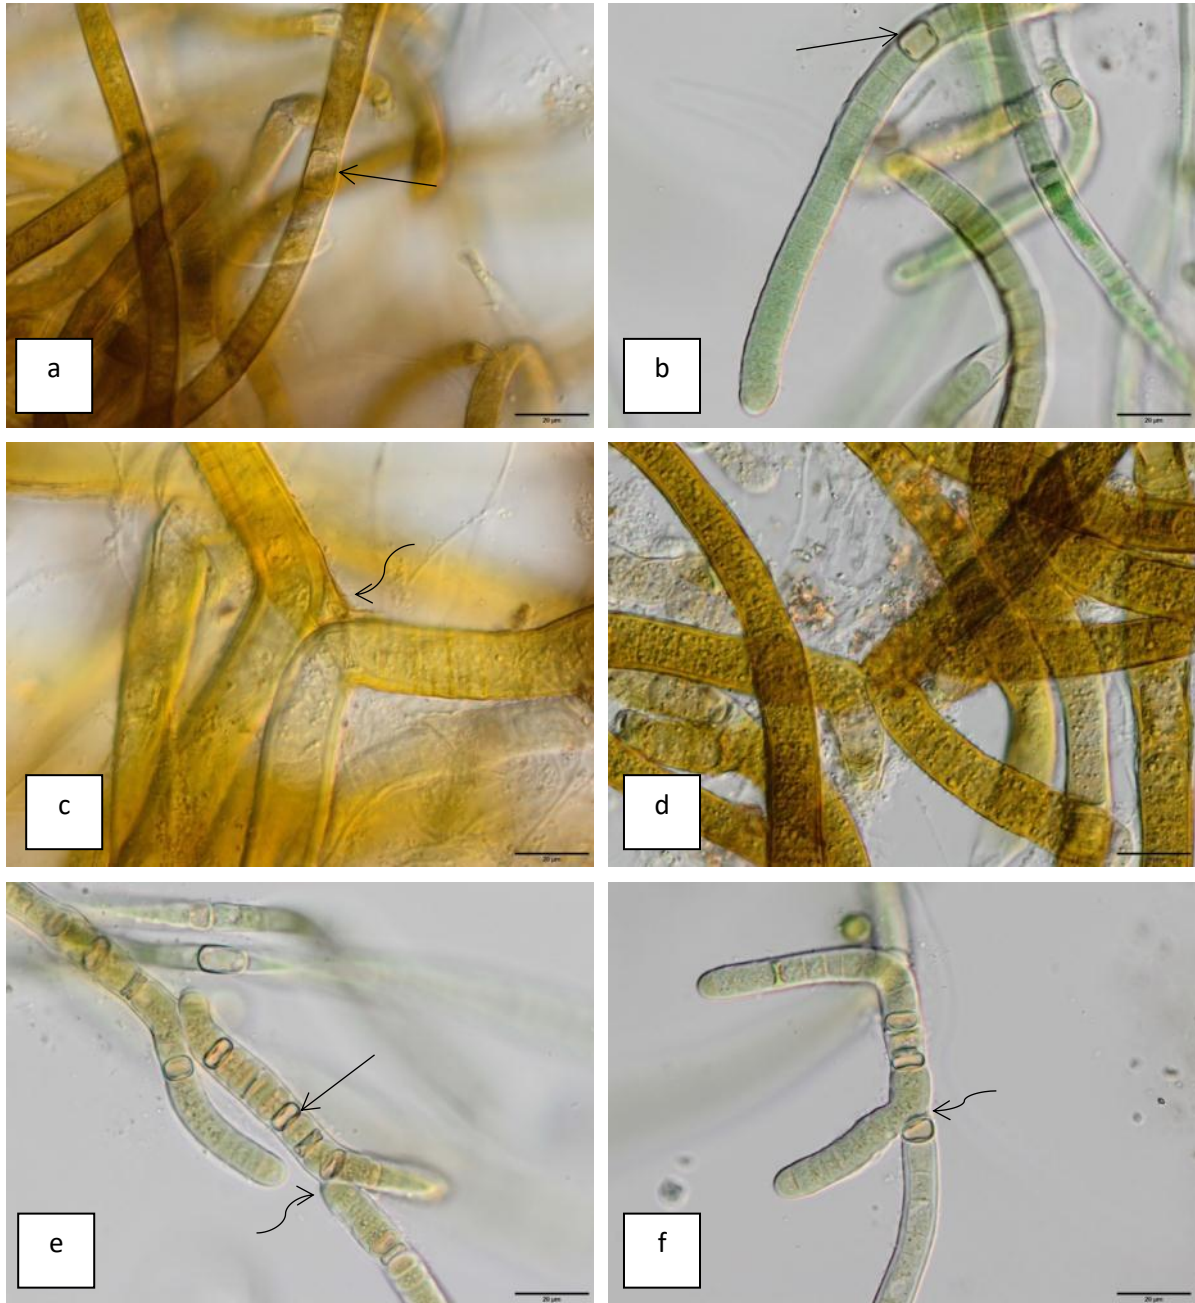

**Figure S4:** *Scytonema* species (a-f) Illustrations of three (of four) apparently different species of *Scytonema* that were identified; morphological attributes that differ between species included cell size and shape, size of heterocysts (straight arrows) and type of branching (curvy arrows); *Scytonema* sp. 2 (c-d) is heavily granulated, golden coloured and larger than the others, most common at Lake Ifould but also found elsewhere; *Scytonema* formed tufted or prostrate colonies on the surface and were rarely seen without UV pigmentation; note (b, e-f) are cultured specimens (scale bars 20 µm).



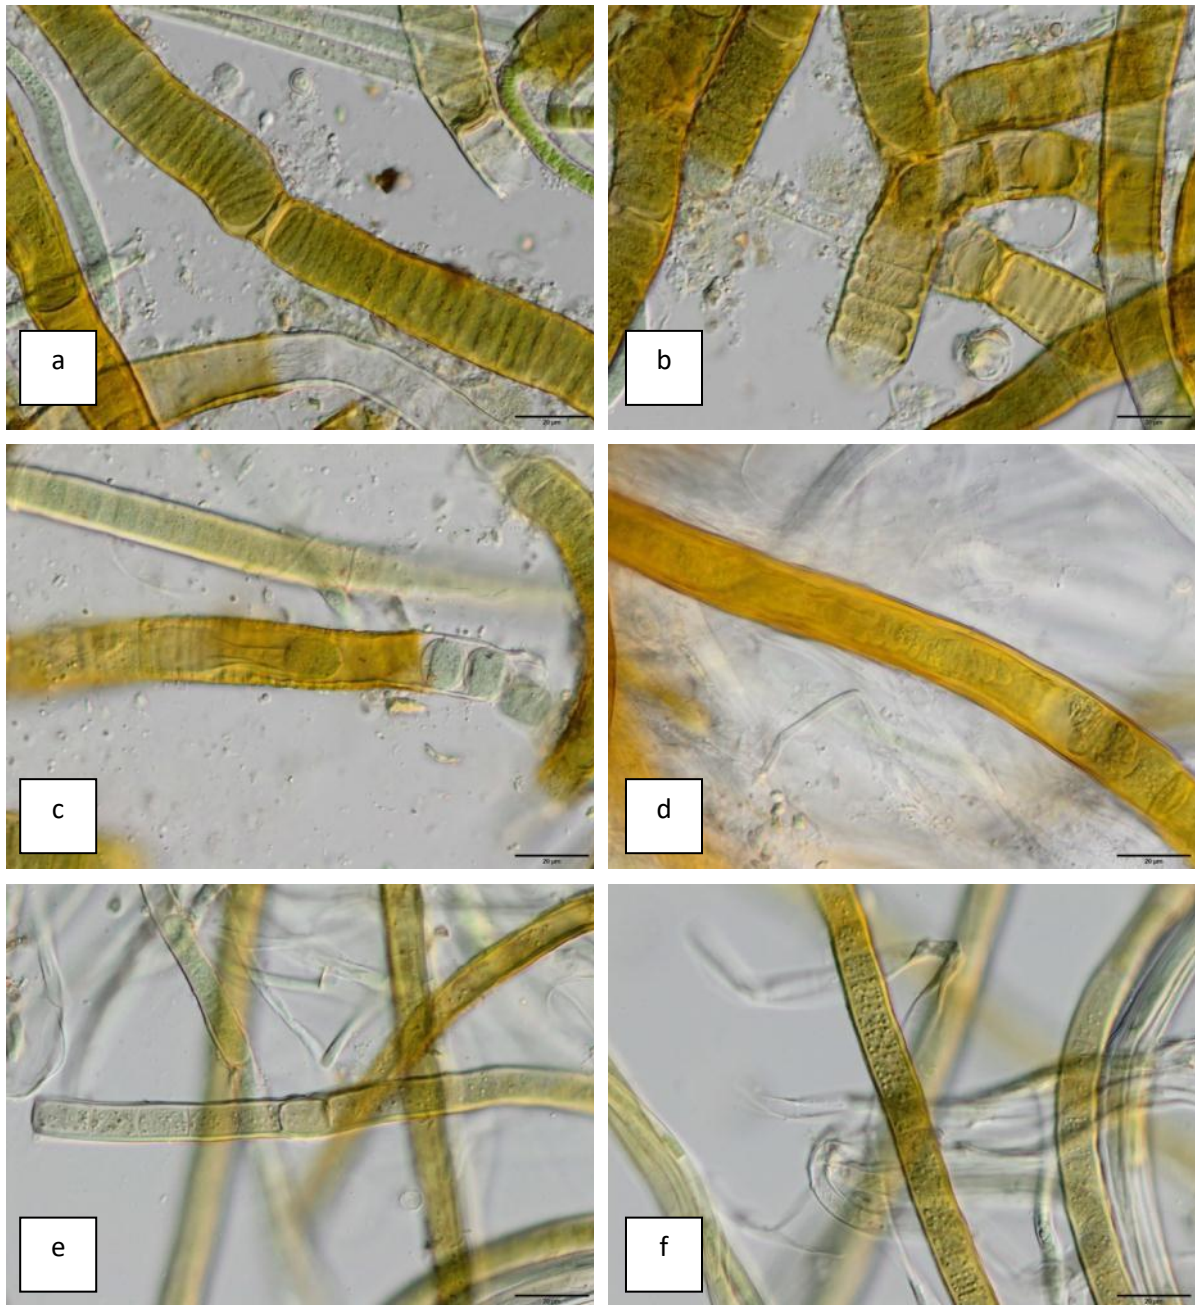

**Figure S5:** *Brasilonema* – *Scytonema* complex: **(a-d)** In these studies this species was identified as most like *Brasilonema* however it contained variable morphology, yet its identity was supported by molecular analysis. *Brasilonema* was almost twice the size of most of the *Scytonema* species in 4.2, contained occasional to numerous heterocytes, a range of cell shapes, false branching; **(e-f)** *Scytonema* species; **(e)** with longer cells than wide, similar to 4.2a and; **(f)** with squarish cells and heavy granulation similar to 4.2d; (scale bars 20 µm).

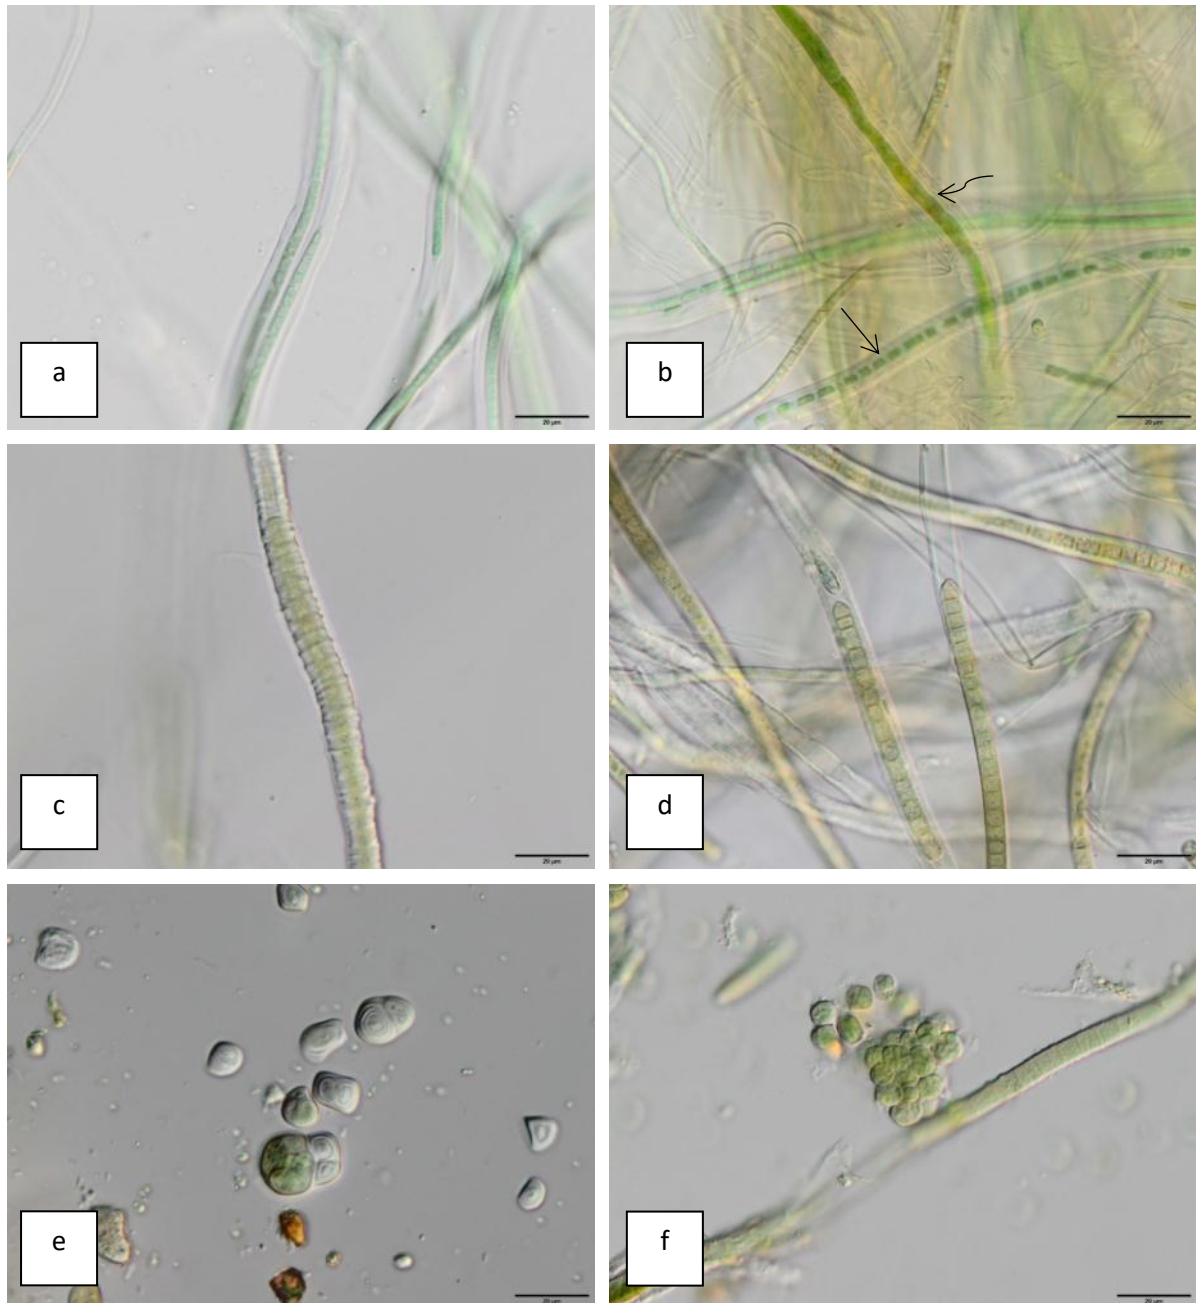

**Figure S6:** (a) *Schizothrix* species; (b) *Leptolyngbya*-like species (arrow) with *Microcoleus* (curvy arrow) and *Schizothrix* (background) intermingled with other cyanobacteria illustrating complex diversity within the micro-scale; (c-d) *Porphyrosiphon* species (1) that was most commonly found that when mature had a crinkled outer sheath (c); and was in very long filaments with an unusual pointed terminal cell; (e) *Gloeocapsa* sp. (unicellular) cyanobacterium encased in thick lamellated EPS layered envelopes; (f) unidentified unicellular Chroococcales; (scale bars 20  $\mu\text{m}$ ).

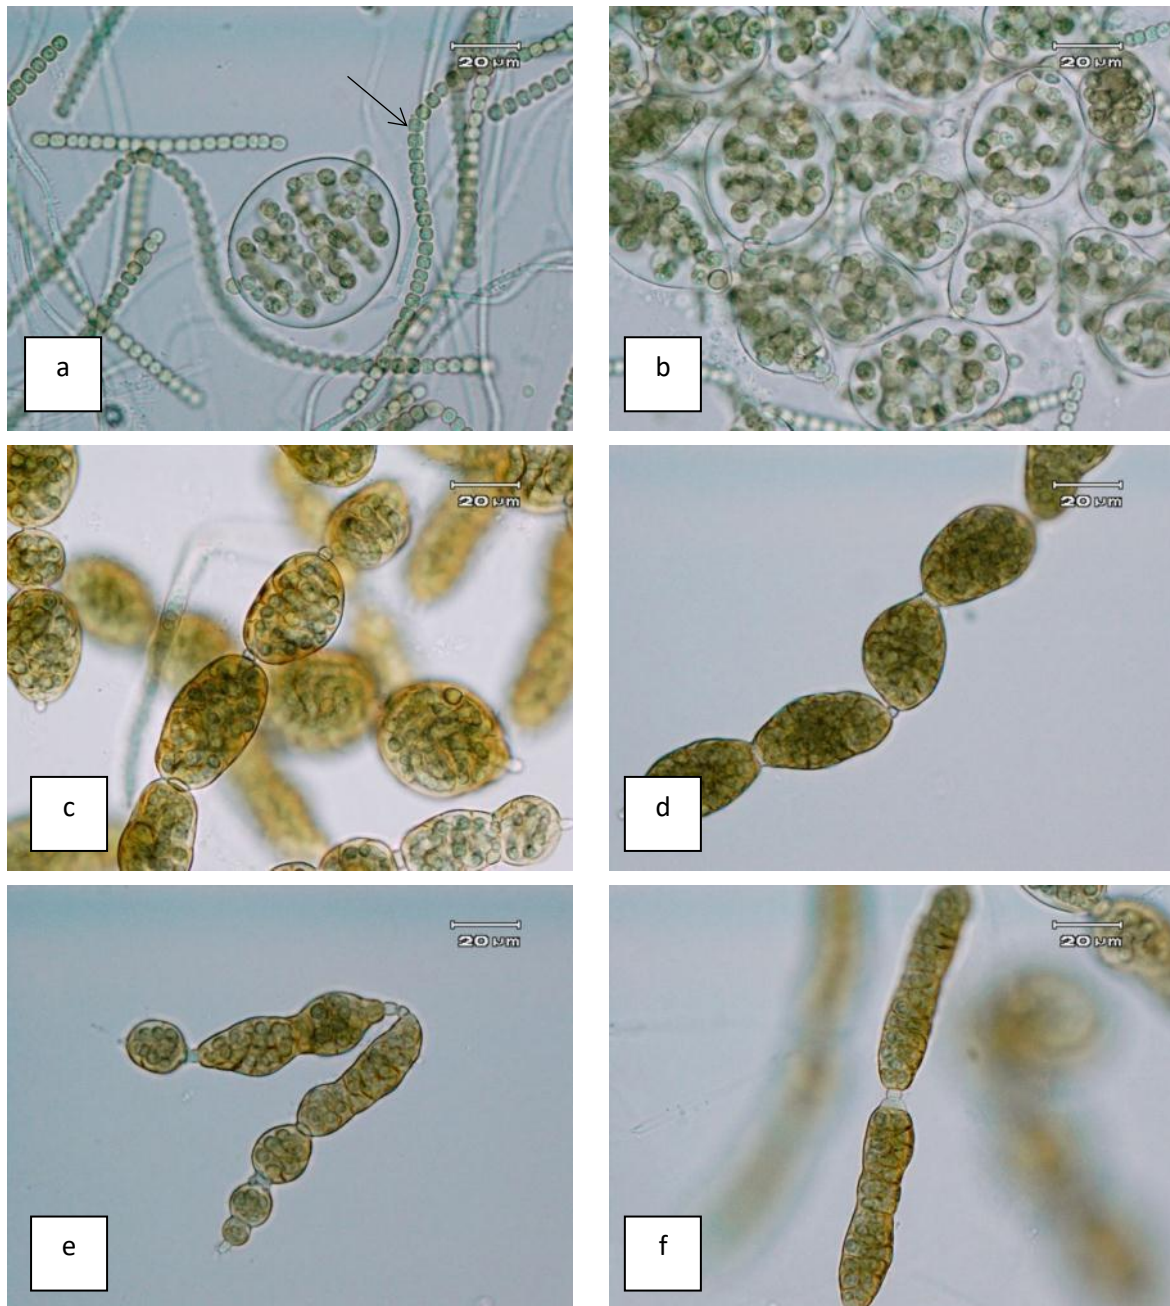

**Figure S7:** (a-f) Early stages and different morphs of *Nostoc* life cycle (cultured); (a-b) illustrating long *Nostoc* cf. *commune* chains (arrows) and sacks containing chains of *Nostoc* cells, about the third phase of its life cycle; (c-d) pigmentation of these cell sacks provides UV protection; (d-e) changing morphs with (e) most likely *Nostoc flagelliforme* (see Aboal et al., 2014); (scale bars 20 µm).

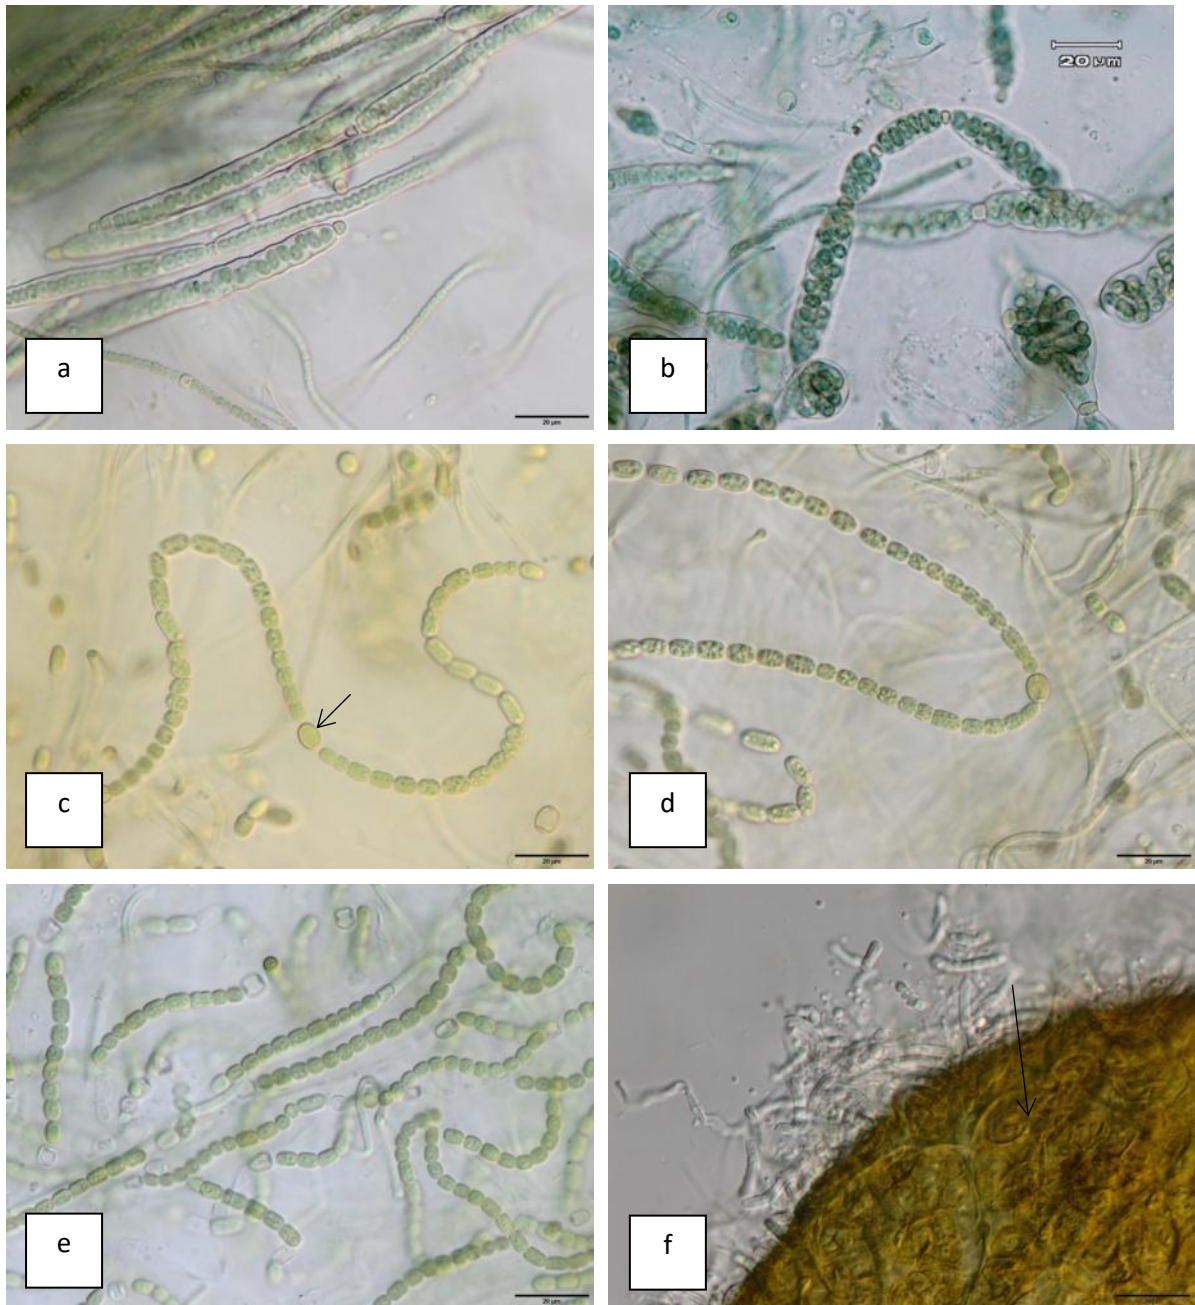

**Figure S8:** *Nostoc* species (cultured); **(a-b)** illustrating elongated parallel filaments of *Nostoc flagelliforme* possibly about the third phase of its life cycle; **(c-d)** long chains *Nostoc* cf. *pruniforme* with linking akinetes (arrow); **(e-f)** *Nostoc* changing morphs with **(e)** most likely tightly packed colonies of *Nostoc commune* in a thick, highly pigmented EPS envelope (arrow); (scale bars 20  $\mu$ m).

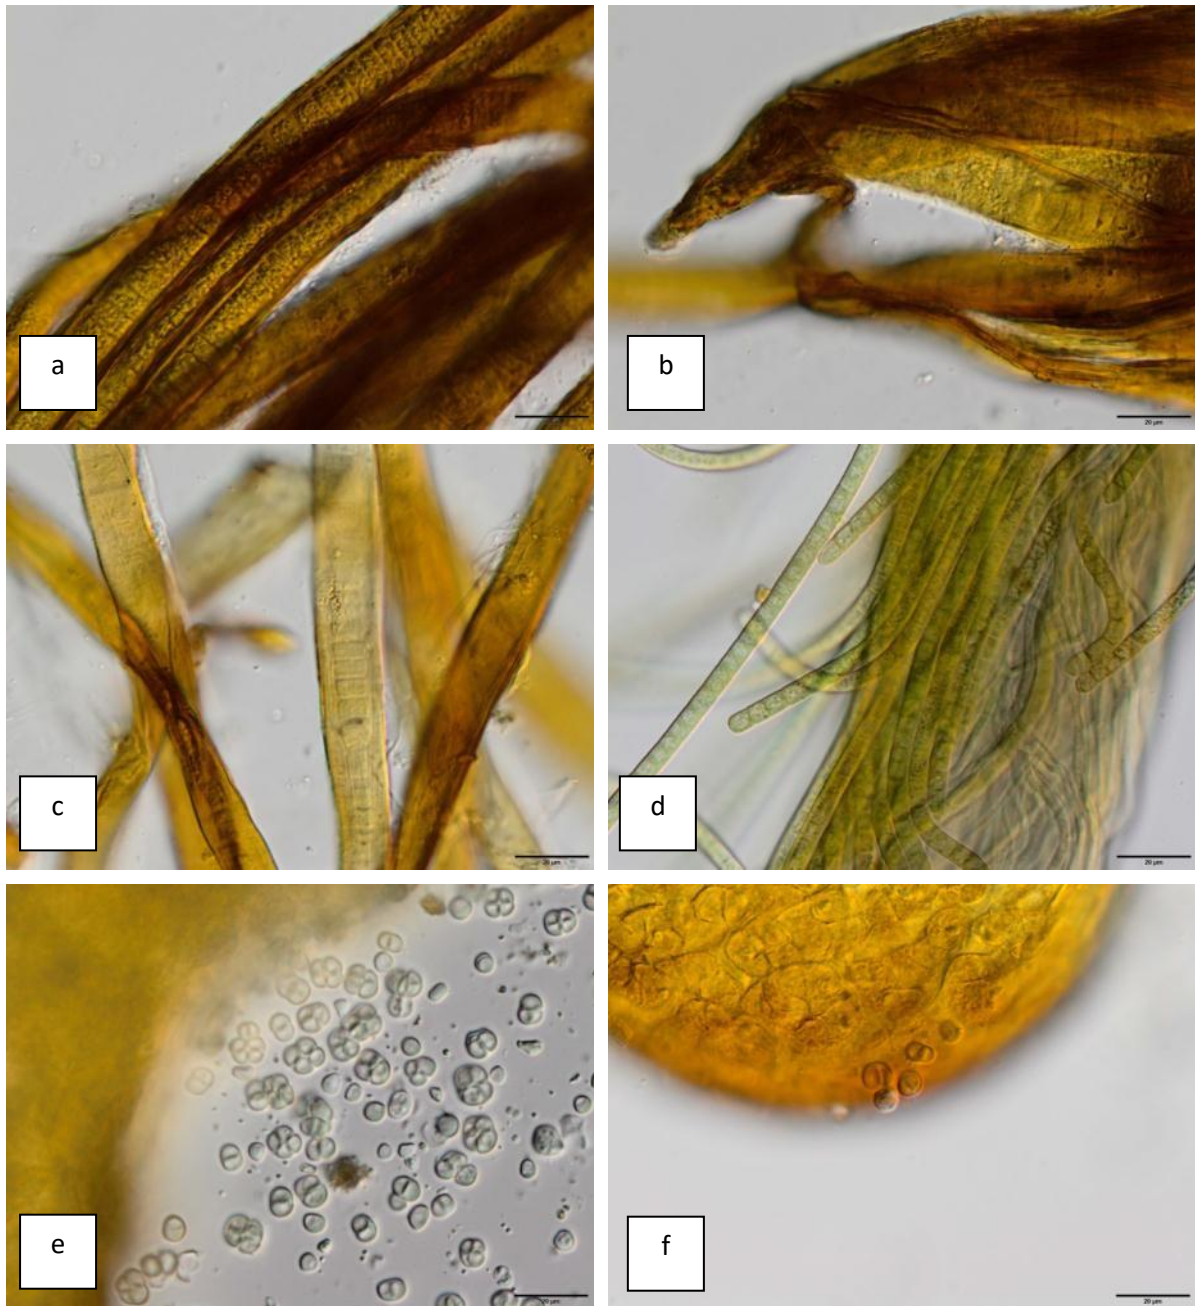

**Figure S9:** (a-c) *Symplocastrum* sp. (from Lake Ifould perimeter) with heavily granulated cells and golden to rust coloured sheaths shown forming a tuft-like peak (b) and; (c) in a partially desiccated state; (d) tightly entwined bundles of *Leptolyngbya* like filaments; (e-f) *Chroococcus* sp. from Lake Ifould perimeter in golden pigmented spherical colony (f); (scale bars 20 μm).

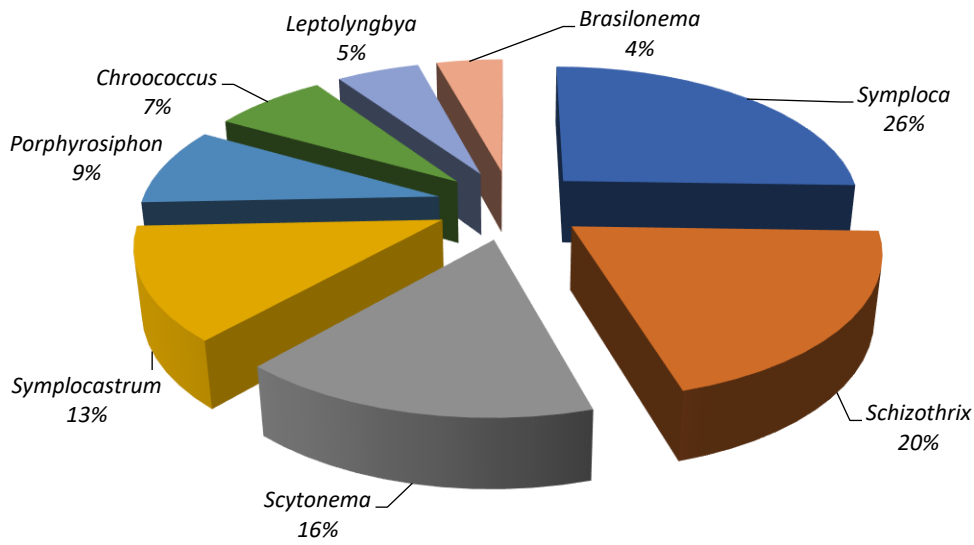

**Figure S10:** Cyanobacterial species richness in SMU 1 shows *Symploca* is dominant while sub-surface cyanobacterium *Schizothrix* is important for binding soil together with EPS. *Symploca*, *Scytonema*, *Porphyrosiphon* and *Brasilonema* contribute to N-fixation.

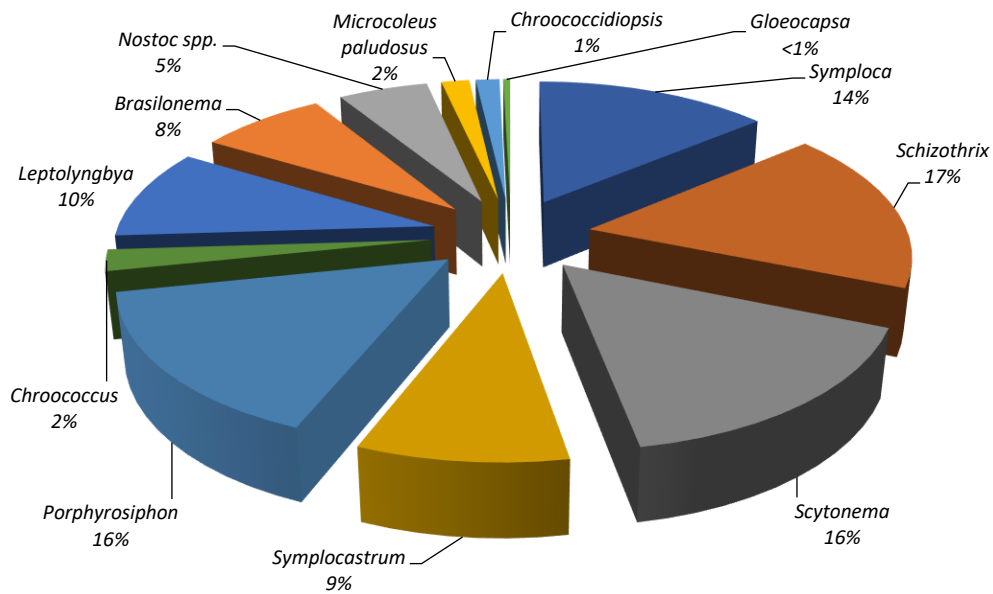

**Figure S11:** Cyanobacterial species richness in SMU 2 shows *Schizothrix*, *Porphyrosiphon*, *Scytonema* and *Symploca* share dominance.

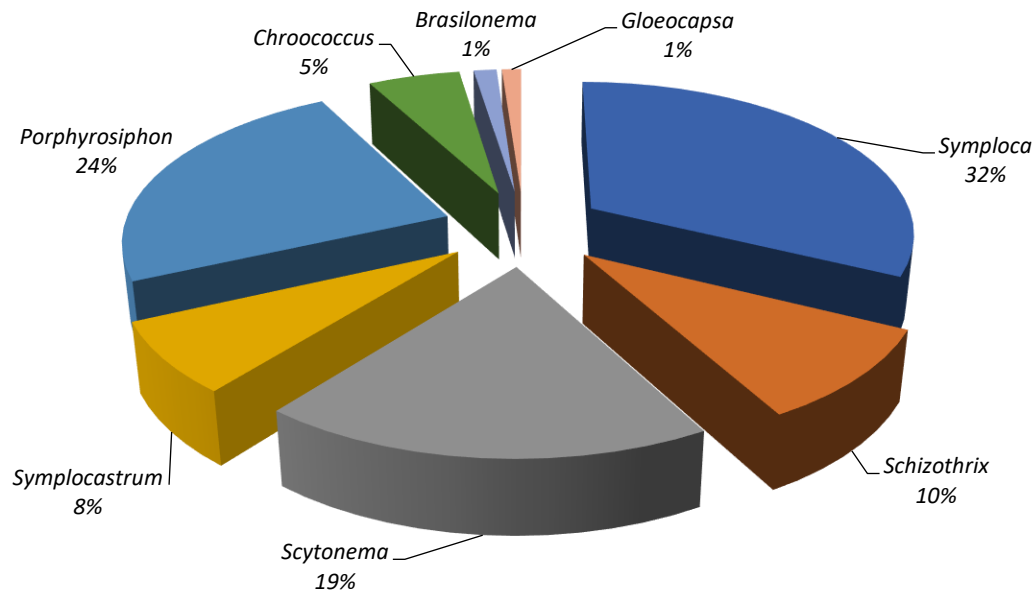

**Figure S12:** Cyanobacterial species richness in SMU 3 shows *Symploca* is clearly dominant with *Porphyrosiphon* and *Scytonema* abundant.

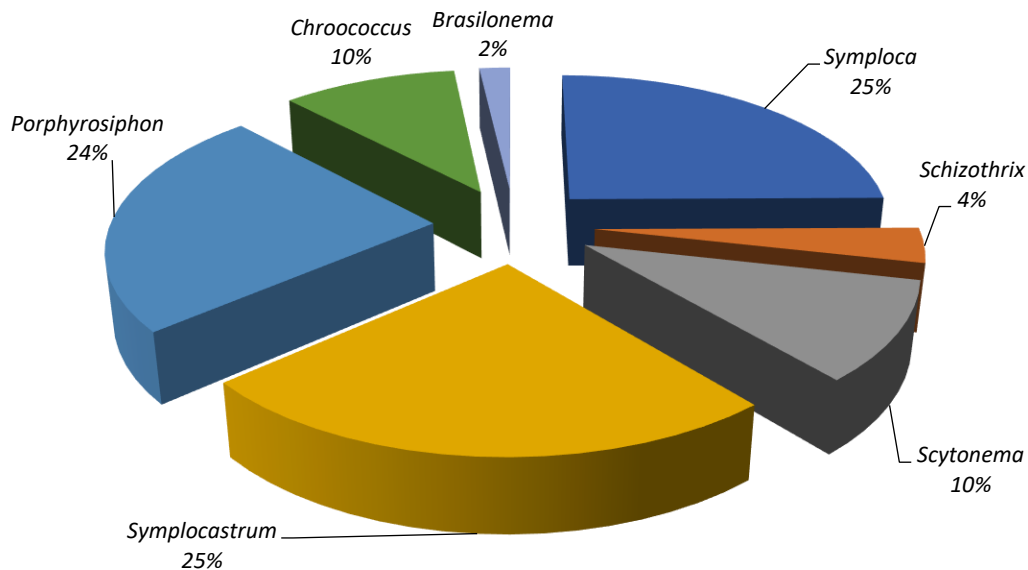

**Figure S13:** Cyanobacterial species richness in Site 6, the 2YO topsoil stockpile (T2) had originated from SMU 3 and mostly reflects the same dominant genera as SMU 3 (*Symploca*) however; *Symploca* and *Symplocastrum* are co-dominant and *Porphyrosiphon* abundant. N-fixing species were *Symploca*, *Porphyrosiphon*, *Scytonema* and *Brasilonema*.
